# Supplementary material for: 1H, 13C and 15N resonance assignment of backbone and IVL-methyl side chain of the S135A mutant NS3pro/NS2B protein of Dengue II virus reveals unique secondary structure features in solution
Source: Springer Nature journal article supplement (doi:10.1007/s12104-022-10071-w), 2022-02-12
Supplement: MOESM1 [file 12104_2022_10071_MOESM1_ESM-1.pdf]

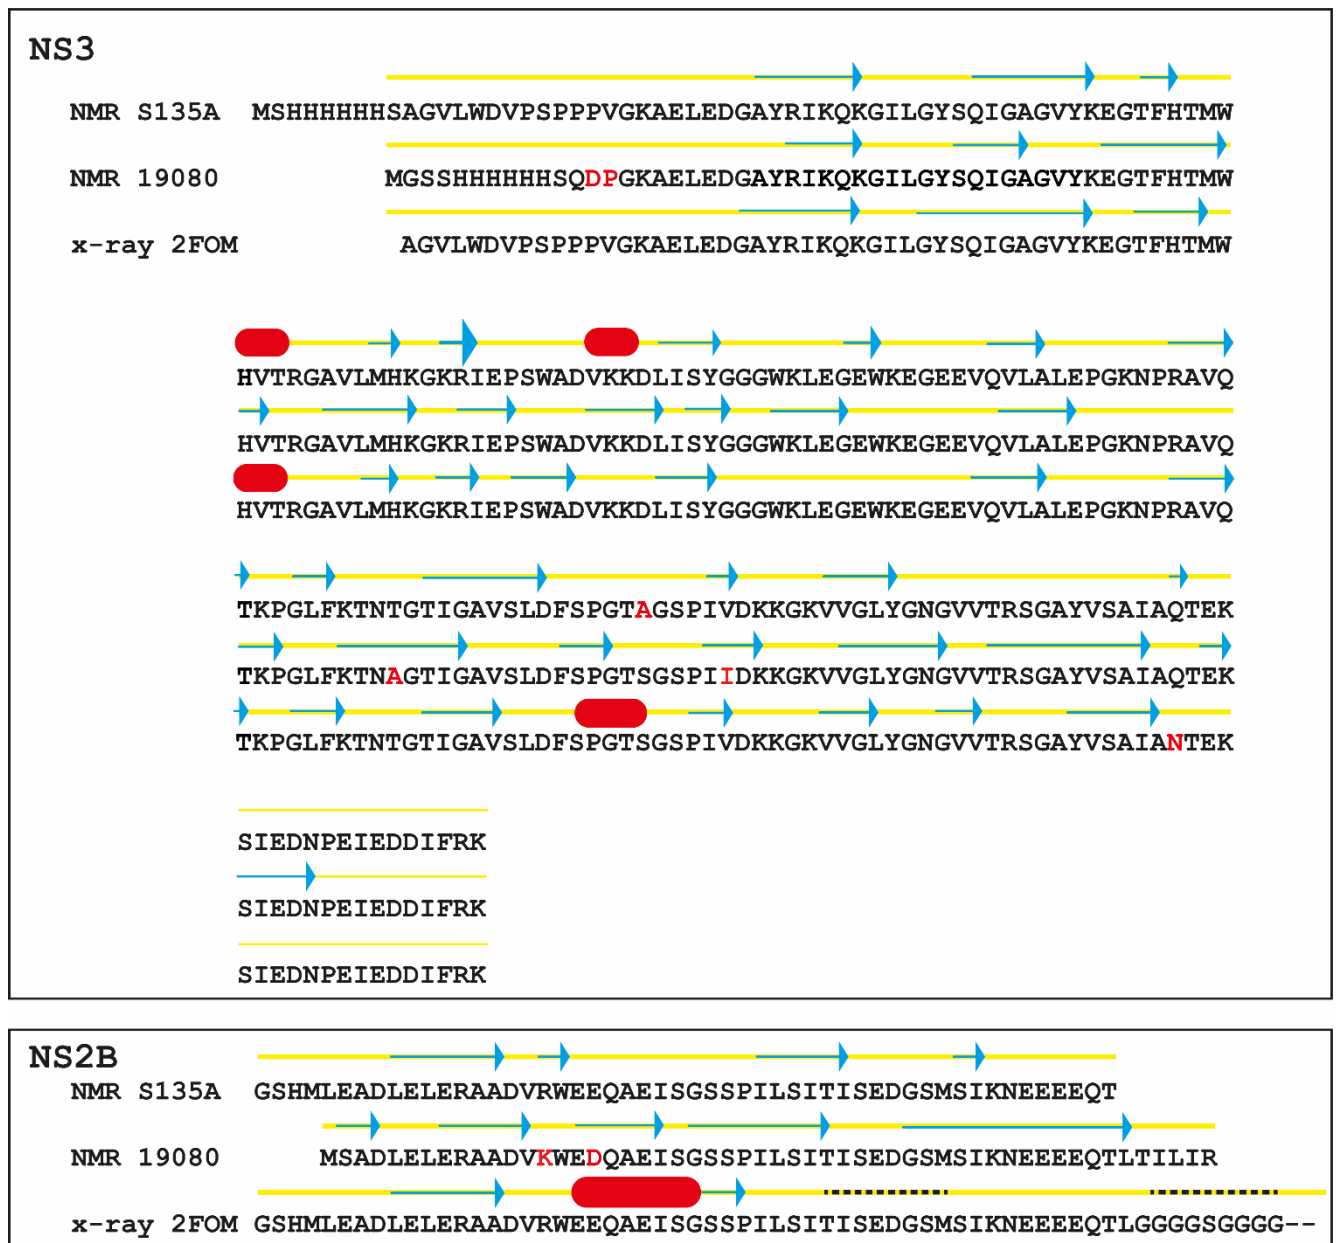

**Figure S1. The secondary structure of the DENV2 NS3pro/NS2B does not agree with the secondary structures of previously determined complexes**

The secondary structures along the sequence for DENV2 NS3pro (Top Panel) and NS2B (Bottom Panel) predicted by TALOS-N software<sup>40</sup> based on the chemical shifts of the backbone are shown. Top sequence: labelled with NMR S135A, obtained in this study, middle sequence: BMRB 19080 presented earlier in<sup>8</sup> and bottom sequence: PDB: 2FOM x-ray secondary structure extracted according to UCSF Chimera<sup>48</sup>. The yellow lines correspond to loop or coil segments in the protein complex, red squares correspond to  $\alpha$ -helices and arrows to  $\beta$ -strands. The sequences are indicated in black, differences in amino acids between sequences are highlighted in red.
